# Supplementary material for: ACT and ADJUST: Evaluating a Layered Emergency Triage Model Integrating Structured Scoring and Physician Judgment
Source: Research Square preprint supplement (doi:10.21203/rs.3.rs-6951401/v1), 2025-06-27
Supplement: Supplementary file 1 [file cae74b3b1b49df5b202c4739.docx]

## **Supplementary File 2. Cross-Classifications Between ACT and ADJUST Triage Assignments**

Caption:
Cross-tabulation of triage assignments comparing the structured intake tool (ACT) with physician-led reassessment (ADJUST) for all emergency department encounters with complete documentation. The matrix illustrates agreement, as well as upward and downward reclassification patterns between the two tiers.

### **Overview**

This supplementary file provides a detailed comparison of structured intake triage (ACT) and physician reassessment (ADJUST) across all documented encounters. The purpose is to evaluate the level of agreement between the two layers and to quantify reclassification events, offering insight into how physician judgment modifies initial prioritization.

### **Cross-Classification Matrix: ACT vs. ADJUST**

The table below shows the full cross-tabulation of acuity assignments where both ACT and ADJUST were recorded. Each cell represents the number of encounters classified into each combination of categories.

**Table A. Cross-tabulation of ACT and ADJUST Triage Assignments**

Each cell shows the number of encounters classified by ACT (row) and reassigned by ADJUST (column). Diagonal values indicate agreement; off-diagonal values reflect reclassification.

| **ACT → ADJUST** | **Red** | **Orange** | **Yellow** | **Green** |
| --- | --- | --- | --- | --- |
| **Red** | 2728 | 5121 | 1532 | 58 |
| **Orange** | 280 | 13710 | 20892 | 1096 |
| **Yellow** | 33 | 1411 | 20559 | 3408 |
| **Green** | 6 | 112 | 1299 | 3376 |

Exact matches are found along the diagonal. Values above the diagonal reflect downward reclassification by ADJUST (e.g., ACT: Red → ADJUST: Orange), while values below the diagonal indicate upgrades (e.g., ACT: Orange → ADJUST: Red). These shifts reflect the physician’s clinical calibration of initial triage levels, adjusting for over- or under-triage introduced during structured intake.

**B.2 Reclassification Summary**

| **Classification Change** | **Count** | **% of Total** |
| --- | --- | --- |
| **Match** | 40373 | 53.4% |
| **Downgrade by ADJUST** | 6711 | 8.9% |
| **Upgrade by ADJUST** | 319 | 0.4% |

ADJUST most frequently downgraded patients initially classified as Red by ACT, with reassignment typically to the Organge category. Upward reclassifications were rare.

These patterns support the interpretation that ACT prioritizes sensitivity for early acuity detection, while ADJUST introduces specificity through clinical refinement. Reclassification often occurred early in the care episode, with nearly half of ADJUST entries timestamped within 15 minutes of ACT. This suggests that, in practice, ACT and ADJUST frequently function as integrated components rather than strictly sequential stages.
