# Supplementary material for: ACT and ADJUST: Evaluating a Layered Emergency Triage Model Integrating Structured Scoring and Physician Judgment
Source: Research Square preprint supplement (doi:10.21203/rs.3.rs-6951401/v1), 2025-06-27
Supplement: Supplementary file 2 [file dad3938283316a1706e7c79f.docx]

### **Supplementary File 1: Structured Intake Criteria for the Acuity Categorization Tool (ACT)**

Caption:
Detailed definitions and clinical triggers used in the ACT model, including early warning scores (NEWS-2 and PEWS), high-acuity flags, and nurse override protocols. Provides the full intake logic and category descriptions for structured prioritization.

###

#### **1. Overview**

The Acuity Categorization Tool (ACT) is a structured triage system developed at Vestfold Hospital Trust to support rapid and structured prioritization of emergency department patients. It integrates physiological scoring, symptom-based triggers, and professional discretion to assign patients to one of four clinical acuity levels. ACT functions as the structured intake component of the dual-layer ACT–ADJUST triage model, preceding physician-led reassessment.

The final triage level is determined by the most concerning finding—whether it stems from vital signs, high-risk presenting symptoms, or professional concern—ensuring that both immediate and anticipated clinical risks are appropriately captured.

#### **2. Triage Categories**

Patients are assigned one of four priority levels based on the most critical finding—whether it stems from vital signs, presenting symptoms, or clinical concern. Each level corresponds to expected clinical risk and monitoring requirements. Acuity levels reflect increasing clinical urgency. The Red and Orange categories are operationally distinct, with Red requiring immediate physician involvement and continuous monitoring, while Orange permits up to 30 minutes for physician contact.

In addition to the four clinical acuity levels, a fifth non-clinical category (“Blue”) is used for patients with low concern who are expected to be discharged directly from the ED. This category facilitates fast-track pathways, helping to balance urgent care demands with efficient management of low-priority cases. “Blue” is excluded from clinical prioritization and outcome analysis.

| **Category** | **NEWS / PEWS Threshold** | **Clinical Description** | **Physician Review Time** | **Monitoring Frequency** | **ECG Monitoring** |
| --- | --- | --- | --- | --- | --- |
| **Red – Critical** | NEWS ≥7 / PEWS ≥5 | Life-/limb-threatening condition | Immediate | Continuous | Required |
| **Orange – Acute** | NEWS ≥5 / PEWS = 4 | Potentially life-/limb-threatening | Within 30 minutes | Every 30 minutes | Required |
| **Yellow – Subacute** | Single NEWS or PEWS = 3 | Symptomatic but not unstable | Within 60 minutes | Every hour | If capacity allows |
| **Green – Can Wait** | NEWS 0–4 / PEWS ≤3 | Clinically stable, may wait | As capacity allows | Every 2 hours | Not required |

#### **3. Physiological Scoring**

ACT incorporates early warning scores to identify physiological derangement:

- Adults: National Early Warning Score 2 (NEWS2)
- Children: Pediatric Early Warning Score (PEWS), adapted to Norwegian practice and based on respiratory rate, heart rate, capillary refill, and clinical appearance (Akuttveileder i pediatri, Helsebiblioteket.no, 2022).[[1]](#footnote-0)

#### **4. Symptom-Based Triggers**

Symptom criteria complement physiological scoring and are categorized using the ABCDE framework. The highest risk finding—whether from vitals or symptoms—determines the triage category.

**Table 1. Symptom-Based Triggers by Acuity Level and Clinical System**

| **ABCDE System** | **Red – Critical** | **Orange – Acute** | **Yellow – Subacute** |
| --- | --- | --- | --- |
| **A – Airway** | Stridor Swelling in airway Potentially threatened airway |  |  |
| **B – Breathing** | Severe dyspnea Respiratory depression | Dyspnea at rest Smoke inhalation in enclosed space | Dyspnea on exertion |
| **C – Circulation** | Major trauma Severe/non-compressible bleeding | Chest pain | Slow/compressible bleeding |
| **D – Disability** | Severe pain Acute neurological deficit Unconsciousness Ongoing seizures Hyperacute headache | Moderate pain Head trauma with anticoagulation Neurological symptoms (onset 12–24h) Altered mental status Repeated syncope  Selfdestructive behaviour | Mild pain Syncope or near-syncope Resolved seizures in known epilepsy |
| **E – Exposure** | Suspected hypothermia Suspected sepsis (NEWS ≥5 or PEWS ≥4 + infection) | Threatened distal neurovascular status Poisoning or hazardous exposure |  |

#### **5. Discretionary Escalation**

Nurses may override the algorithmically assigned triage level when clinical judgment indicates a higher level of concern. All justifications for such overrides must be documented in the ED trackboard.

#### **6. Physician Reassessment – ADJUST Layer**

The Adaptive Judgment of Urgency and Streaming (ADJUST) layer introduces physician-led reassessment following ACT intake. Clinicians may confirm or revise the assigned acuity based on a broader clinical picture, including:

- Focused history and physical examination
- Treatment response and evolving symptoms
- Care goals and system-level constraints (e.g., staffing, bed capacity)
- Risk of deterioration or diagnostic uncertainty

Reassessment may result in escalation or de-escalation of acuity. A lower response level may be appropriate when abnormalities are habitual, resolving, or clinically irrelevant. ADJUST uses the same four-level scale as ACT to maintain consistency in acuity classification, monitoring frequency and patient placement. This alignment supports structured communication and coordinated care throughout the department.

ADJUST may be applied sequentially or concurrently with ACT, depending on workflow. Reclassification—especially downgrades—serves a critical role in preventing over-triage. By safely reclassifying patients to lower-acuity zones when appropriate, ADJUST reduces unnecessary monitoring, alleviates pressure on high-resource areas, and enhances the availability of critical care capacity. This targeted de-escalation promotes both patient safety and operational efficiency within the emergency department.

#### **7. Documentation**

Triage decisions must be documented in the ED trackboard as early as feasible. In high-acuity scenarios (e.g., cardiac arrest), documentation may be delayed due to immediate clinical priorities, but retrospective entry is required.

1. Available from: Akuttveileder i pediatri – 1.14: Pediatrisk tidlig varslingsskår, triage og kommunikasjon. Helsebiblioteket.no. Norwegian Paediatric Association; 2022. Available from: <https://www.helsebiblioteket.no/innhold/retningslinjer/pediatri/akuttveileder-i-pediatri/1.akutte-prosedyrer-og-tilstander-inkludert-ulykker/1.14-pediatrisk-tidlig-varslingsskar-triage-og-kommunikasjon>. Accessed 16 May 2025. [↑](#footnote-ref-0)
